# Supplementary material
Source: PubMed Central journal article supplement (PMC11041743)
Supplement: 44220_2023_81_MOESM1_ESM.pdf [file 44220_2023_81_MOESM1_ESM.pdf]

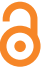

**Analysis**

<https://doi.org/10.1038/s44220-023-00081-5>

---

Systematic review and individual  
participant data meta-analysis  
of randomized controlled trials  
assessing mindfulness-based  
programs for mental health pro-  
motionIn the format provided by  
the authors and unedited

**Individual participant data systematic review and meta-analysis of randomised controlled trials assessing adult mindfulness-based programmes for mental health promotion in non-clinical settings**

Supplementary materials

[Table of Contents](#)

|                             |   |
|-----------------------------|---|
| Supplementary Tables .....  | 2 |
| Supplementary Figures ..... | 5 |

## Supplementary Tables

**Table 1. Percentage missing data on primary outcome**

| Dataset  |             | Missing (%) |
|----------|-------------|-------------|
| All      |             | 20          |
| By Arm   | MBP         | 19          |
|          | Passive     | 22          |
|          | Active      | 16          |
| By Study | Aeamla      | 1           |
|          | Barrett2012 | 4           |
|          | Barrett2018 | 7           |
|          | Christopher | 20          |
|          | Errazuriz   | 54          |
|          | Galante     | 24          |
|          | Huang       | 30          |
|          | Hwang       | 33          |
|          | Kral        | 22          |
|          | MacKinnon   | 30          |
|          | Schellekens | 30          |
|          | Siebelink   | 10          |
|          | vanDijk     | 22          |

**Table 2 . Risk of bias assessment for individual studies.**

| <b>Study</b>     | <b>D1</b> | <b>D2</b>                                         | <b>D3</b> | <b>D4</b> | <b>D5</b> |
|------------------|-----------|---------------------------------------------------|-----------|-----------|-----------|
| Aeamla-Or 2015   | Low       | High                                              | Low       | High      | Low       |
| Barrett 2012     | Low       | High for Passive Control. Low for Active Control. | Low       | High      | Low       |
| Barrett 2018     | Low       | High for Passive Control. Low for Active Control. | Low       | High      | Low       |
| Christopher 2018 | Low       | High                                              | Low       | High      | Low       |
| Errazuriz 2020   | Low       | High for Passive Control. Low for Active Control. | Low       | High      | Low       |
| Galante 2018     | Low       | High                                              | Low       | High      | Low       |
| Huang 2015       | Low       | High                                              | Low       | High      | Low       |
| Hwang 2019*      | Low       | High                                              | Low       | High      | Low       |
| Kral 2019        | Low       | High for Passive Control. Low for Active Control. | Low       | High      | Low       |
| MacKinnon 2021   | Low       | High                                              | Low       | High      | Low       |
| Schellekens 2017 | Low       | High                                              | Low       | High      | Low       |
| Siebelink 2021*  | Low       | High                                              | Low       | High      | Low       |
| Van Dijk 2017*   | Low       | High                                              | Low       | High      | Low       |

The RoB2 tool measures potential bias across five sources (called 'domains' in the tool): D1 (randomisation); D2 (deviations from intended interventions); D3 (missing outcome data); D4 (measurement of the outcome); and D5 (selection of the reported result). \* Cluster RCTs, which were assessed with their specific sub-set of questions. Abbreviations: high (high risk); low (low risk).

**Table 3. Grading of Recommendations Assessment, Development and Evaluation (GRADE) assessment details by confidence domain: risk of bias, non-reporting bias, imprecision, inconsistency, and indirectness.**

| <b>Control group</b> | <b>Time point</b> | <b>RoB</b>  | <b>Non-rep bias</b> | <b>Imprecision</b> | <b>Inconsistency</b> | <b>Indirectness</b> | <b>GRADE confidence</b> |
|----------------------|-------------------|-------------|---------------------|--------------------|----------------------|---------------------|-------------------------|
| passive              | post-int          | Not serious | Serious             | Not serious        | Not serious          | Not serious         | Moderate                |
| passive              | 1-6m              | Not serious | Not serious         | Not serious        | Not serious          | Not serious         | High                    |
| passive              | 6+m               | Not serious | Serious             | Serious            | Not serious          | Not serious         | Low                     |
| active               | post-int          | Not serious | Serious             | Serious            | Serious              | Not serious         | Very Low                |
| active               | 1-6m              | Not serious | Serious             | Serious            | Serious              | Not serious         | Very Low                |

Abbreviations: RoB (Risk of bias); Post-int (follow-up at post-intervention); 1-6m (follow-up within 1-6 months post-intervention); 6+m (follow-up over 6 months post-intervention).

## Supplementary Figures

### IPD meta-analysis of gender interaction: distress at 1-6 months follow-up, passive controls

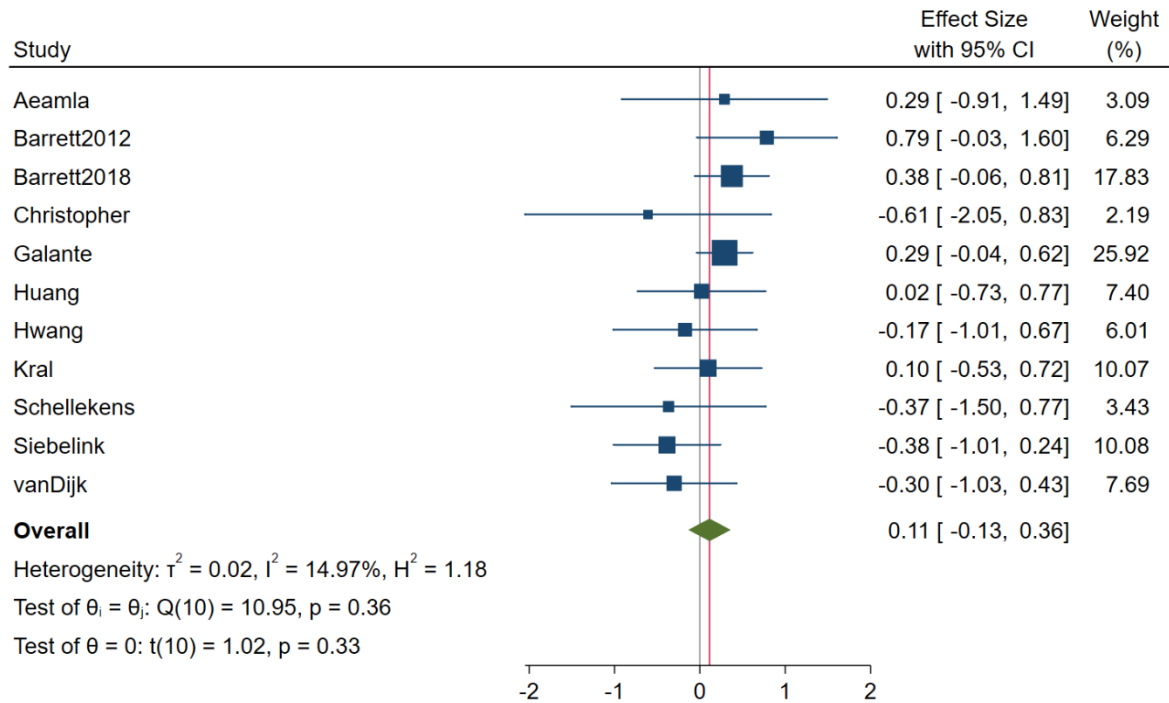

Random-effects REML model  
 Truncated Knapp-Hartung standard errors

**Supplementary Figure 1. Individual participant meta-analysis of gender interaction: distress at 1-6 months follow-up, passive controls. Random-effects meta-analysis using the restricted maximum likelihood method (two-sided test with no adjustment for multiple comparisons). N= 2,206 participants. Data are presented as standardised mean differences (SMD) with 95% confidence intervals (CI).**

IPD meta-analysis of education interaction: distress at 1-6 months follow-up, passive controls

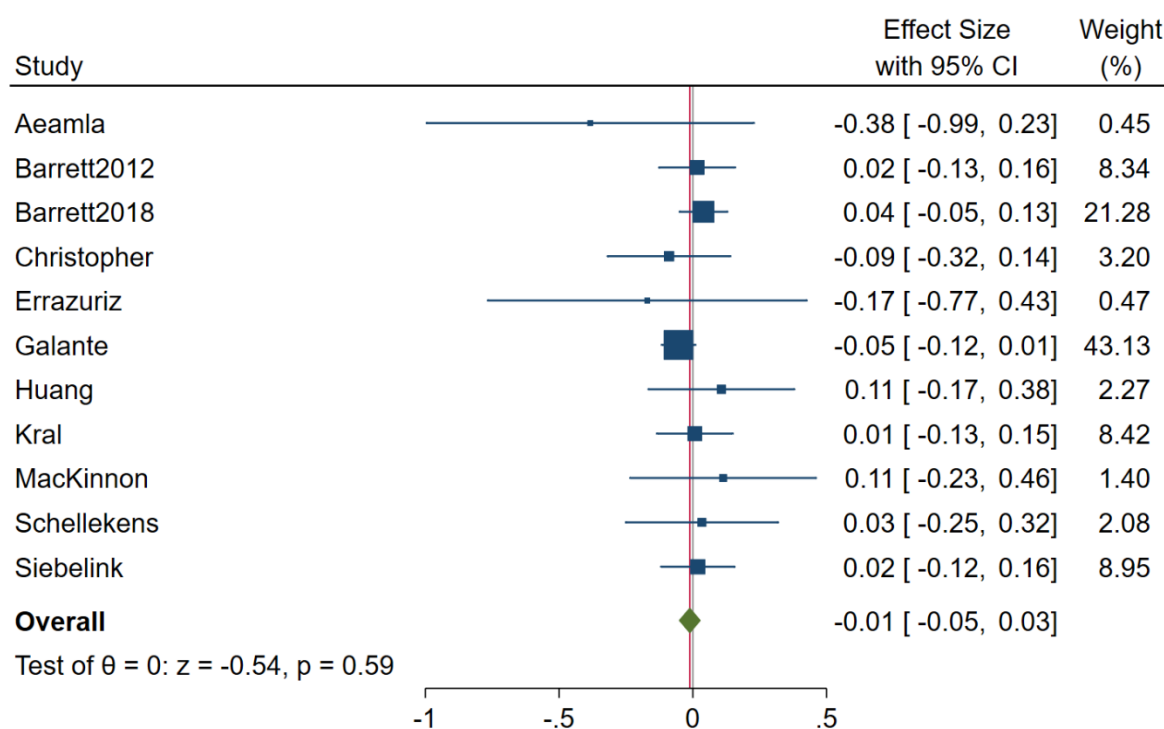

Common-effect inverse-variance model

**Supplementary Figure 2. Individual participant meta-analysis of education interaction: distress at 1-6 months follow-up, passive controls. Random-effects meta-analysis using the restricted maximum likelihood method (two-sided test with no adjustment for multiple comparisons). N= 2,019 participants. Data are presented as standardised mean differences (SMD) with 95% confidence intervals (CI).**

IPD meta-analysis of distress interaction: distress at 1-6 months follow-up, passive controls

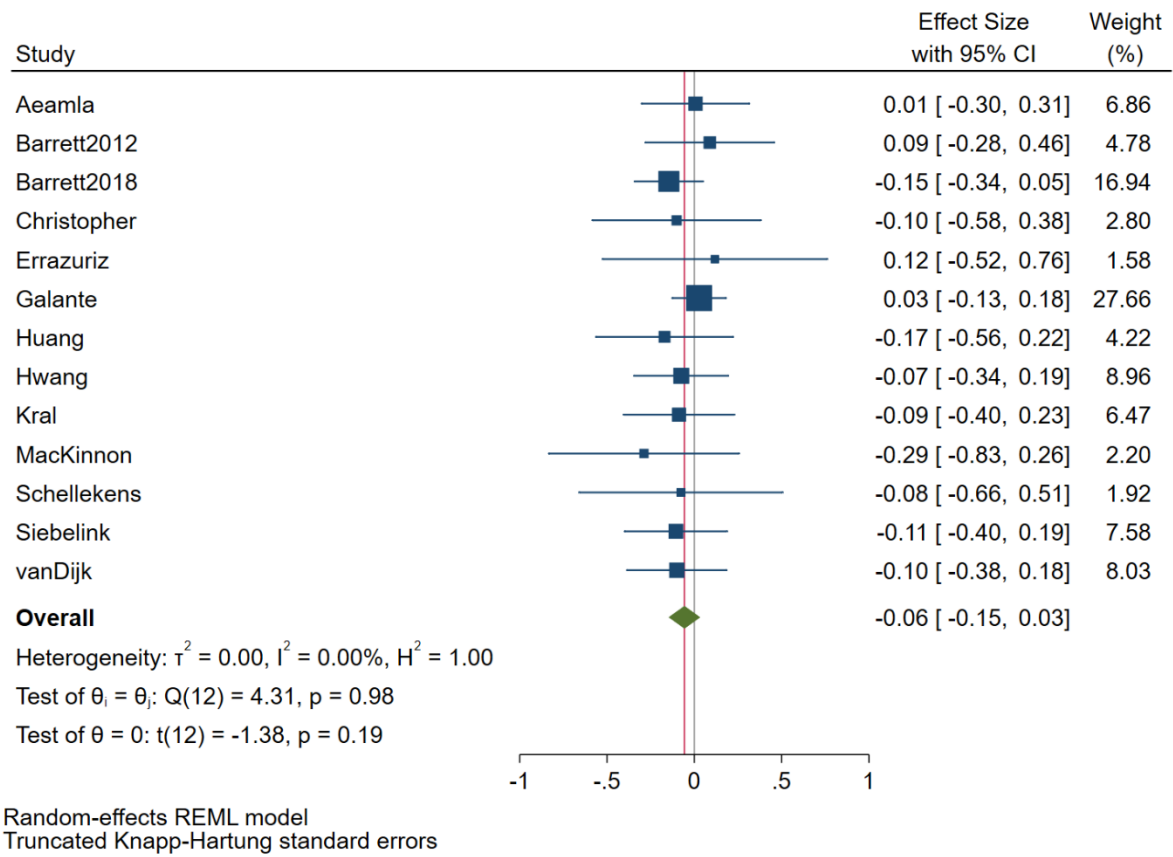

**Supplementary Figure 3. Individual participant meta-analysis of distress interaction: distress at 1-6 months follow-up, passive controls. Random-effects meta-analysis using the restricted maximum likelihood method (two-sided test with no adjustment for multiple comparisons). N= 2,371 participants. Data are presented as standardised mean differences (SMD) with 95% confidence intervals (CI).**



IPD meta-analysis of age interaction: distress at 1-6 months follow-up, passive controls

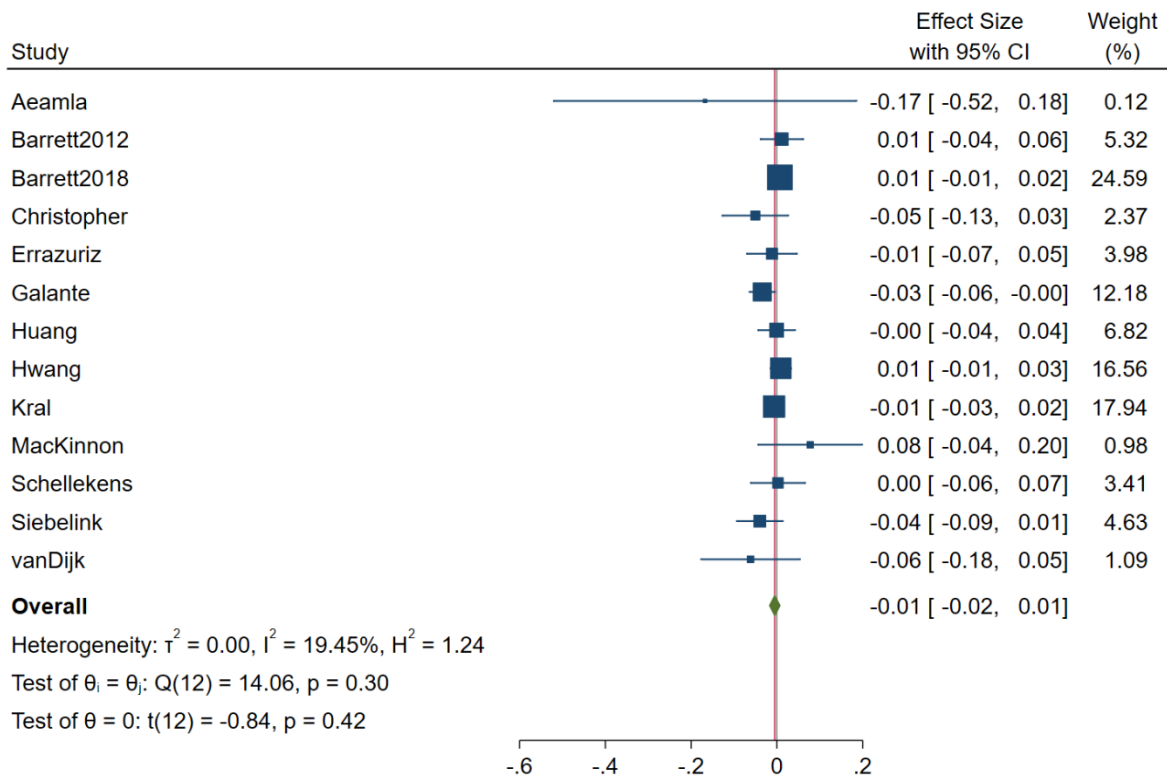

Random-effects REML model  
 Truncated Knapp-Hartung standard errors

**Supplementary Figure 4. Individual participant meta-analysis of age interaction: distress at 1-6 months follow-up, passive controls. Random-effects meta-analysis using the restricted maximum likelihood method (two-sided test with no adjustment for multiple comparisons). N= 2,371 participants. Data are presented as standardised mean differences (SMD) with 95% confidence intervals (CI).**

IPD meta-analysis of mindfulness interaction: distress at 1-6 months follow-up, passive controls

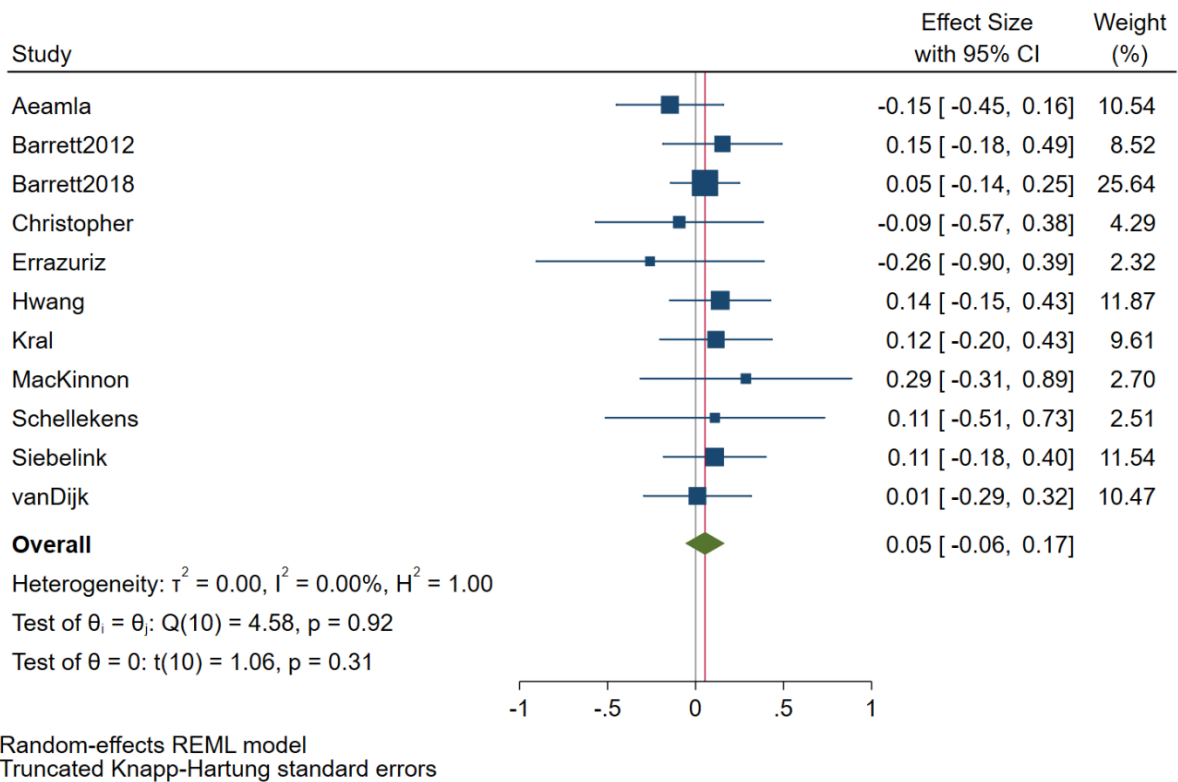

**Supplementary Figure 5. Individual participant meta-analysis of mindfulness interaction: distress at 1-6 months follow-up, passive controls. Random-effects meta-analysis using the restricted maximum likelihood method (two-sided test with no adjustment for multiple comparisons). N= 1,557 participants. Data are presented as standardised mean differences (SMD) with 95% confidence intervals (CI).**
